# Supplementary material for: Simple and direct electrochemical detection of rosmarinic acid in food samples based on nanochannel modified carbon electrode
Source: Royal Society of Chemistry journal article supplement (doi:10.1039/d4ra03063j), 2024-01-01
Supplement: d4ra03063j1.pdf [file d4ra03063j1.pdf]

Table S1. Comparison between detection of Ros A using different method.

| Electrode                                                           | Method | Sample                                 | Linear range ( $\mu\text{M}$ ) | DL ( $\mu\text{M}$ ) | Ref.      |
|---------------------------------------------------------------------|--------|----------------------------------------|--------------------------------|----------------------|-----------|
| Y:Yb/Er-Cit-CD/oxTMB                                                | FL     | Rosemary bread                         | 0.010-5.00                     | 0.004                | [2]       |
| PoPD/Pt/GCE                                                         | DPV    | Melissa officinalis drug plant         | 1.00-55.0                      | 0.500                | [3]       |
| GO-Peptide/SPCE                                                     | CV     | Cosmetic Products                      | 0.100-3.20                     | 0.097                | [11]      |
| IL/CNTs-PE                                                          | CV     | Edible Flowers                         | 0-680                          | 0.015                | [57]      |
| $\text{Fe}_3\text{O}_4$ -Pc-CMWNTs/MGCE                             | CV     | leach liquor of plants and Human serum | 0.200- 400                     | 0.182                | [58]      |
| $\text{Fe}_3\text{O}_4$ @ $\text{SiO}_2$ @ $\text{NH}_2$ @MMIP/CPEs | CV     | plant extracts                         | 0.100-500                      | 0.085                | [59]      |
| VMSF/p-GCE                                                          | CV     | rosemary tea leaves and powder         | 0.500-22.0                     | 0.026                | This work |

Y:Yb,  $\text{NaYF}_4$ :Yb; Er-Cit-CD,  $\beta$ -cyclodextrin modified citric acid; oxTMB, oxidized 3, 3', 5, 5'-tetramethylbenzidine; FL, fluorescence; PoPD, Poly (o-phenylenediamine); Pt, Pt nanoparticles; GCE, glassy carbon electrode; DPV, differential pulse voltammetry; GO, graphene oxide; SPCE, screen-printed carbon electrode ; CV, cyclic voltammetry; IL, ionic liquid; CNTs, carbon nanotubes; CNTs-PE, CNTs paste electrode; Pc, phthalocyanine; CMWCNTs, carbonylated multiwalled carbon nanotubes; MGCE, magnetic glassy carbon electrode; MMIP, magnetic molecularly imprinted polymer; CPEs, carbon paste electrodes

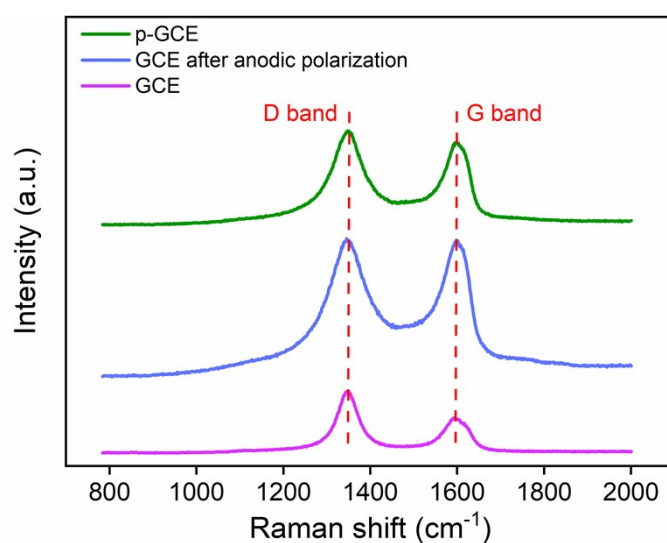

Fig. S1. Raman spectra obtained on different electrodes.

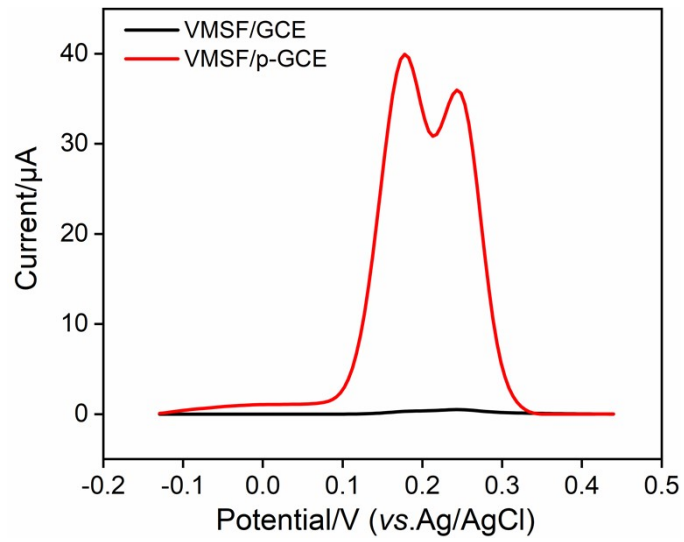

Fig. S2. DPV curves obtained on different electrodes in Ros A (20 μM) solution.

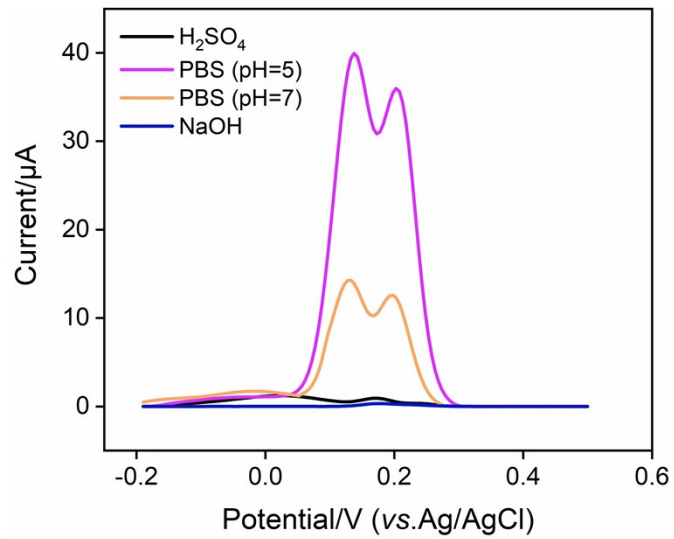

Fig. S3. DPV curves obtained in Ros A (20 μM) using VMSF/p-GCE electrodes fabricated on p-GCE prepared using different solutions.

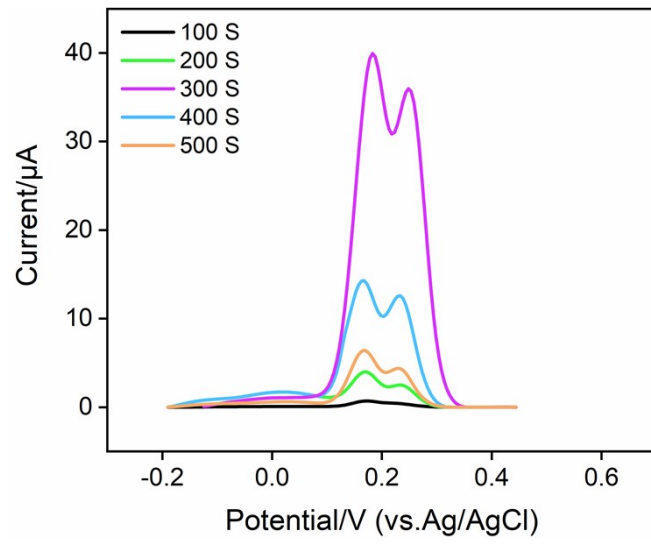

Fig. S4. DPV curves obtained in Ros A (20 μM) using VMSF/p-GCE electrodes fabricated on p-GCE prepared using different anodizing time.
